# Supplementary material for: Human B cell lineages associated with germinal centers following influenza vaccination are measurably evolving
Source: eLife journal article supplement (doi:10.7554/elife.70873), 2021-11-17
Supplement: supp [file elife-70873-supp-v2.zip]

Archive with 13 entries (13 files):
- elife_poa_e70873_Figure_1_figure_supplement_1.pdf
- elife_poa_e70873_Figure_1_figure_supplement_2.pdf
- elife_poa_e70873_Figure_1_figure_supplement_3.pdf
- elife_poa_e70873_Figure_1_figure_supplement_4.pdf
- elife_poa_e70873_Figure_1_figure_supplement_5.pdf
- elife_poa_e70873_Figure_2_figure_supplement_1.pdf
- elife_poa_e70873_Figure_2_figure_supplement_2.pdf
- elife_poa_e70873_Figure_2_figure_supplement_3.pdf
- elife_poa_e70873_Figure_2_figure_supplement_4.pdf
- elife_poa_e70873_Figure_3_figure_supplement_1.pdf
- elife_poa_e70873_Figure_3_figure_supplement_2.pdf
- elife_poa_e70873_Figure_3_figure_supplement_3.pdf
- elife_poa_e70873_Transparent_Reporting_File.pdf
