# Supplementary material for: Human B cell lineages associated with germinal centers following influenza vaccination are measurably evolving
Source: eLife journal article supplement (doi:10.7554/elife.70873), 2021-11-17

**A Uniform** $r = 0.43$ 

26 clusters (tips)

 $6.6 \times 10^5$  permutations $p = 0.014$ 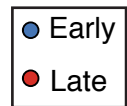0.01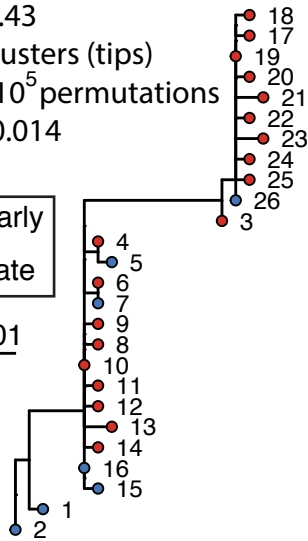**B Clustered, non-resolved** $r = 0.43$ 

21 clusters

 $1.2 \times 10^5$  permutations $p = 0.046$ 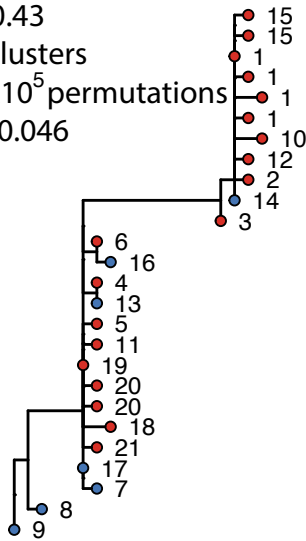**C Clustered, resolved** $r = 0.43$ 

11 clusters

462 permutations

 $p = 0.31$ 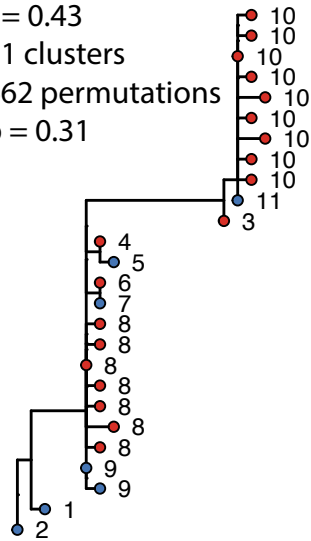

Supplement: supp [file elife_poa_e70873_Figure_1_figure_supplement_1.pdf › elife_poa_e70873_Figure_1_figure_supplement_1.pdf]
