# Supplementary figures and images for: Human B cell lineages associated with germinal centers following influenza vaccination are measurably evolving
Source: eLife journal article supplement (doi:10.7554/elife.70873), 2021-11-17

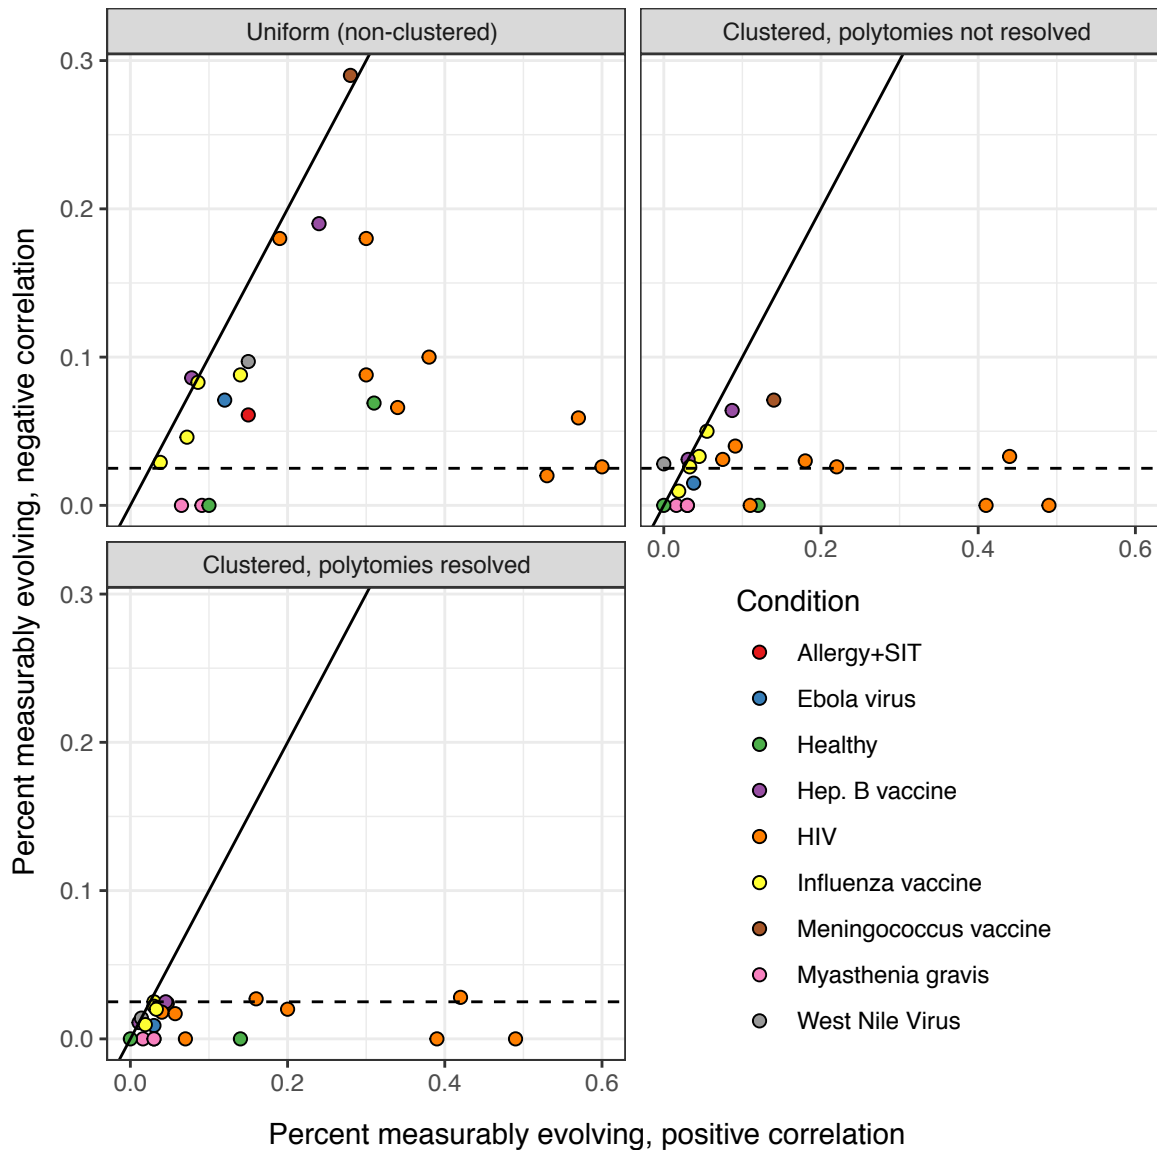

Supplement: supp [file elife_poa_e70873_Figure_1_figure_supplement_2.pdf › elife_poa_e70873_Figure_1_figure_supplement_2.pdf]

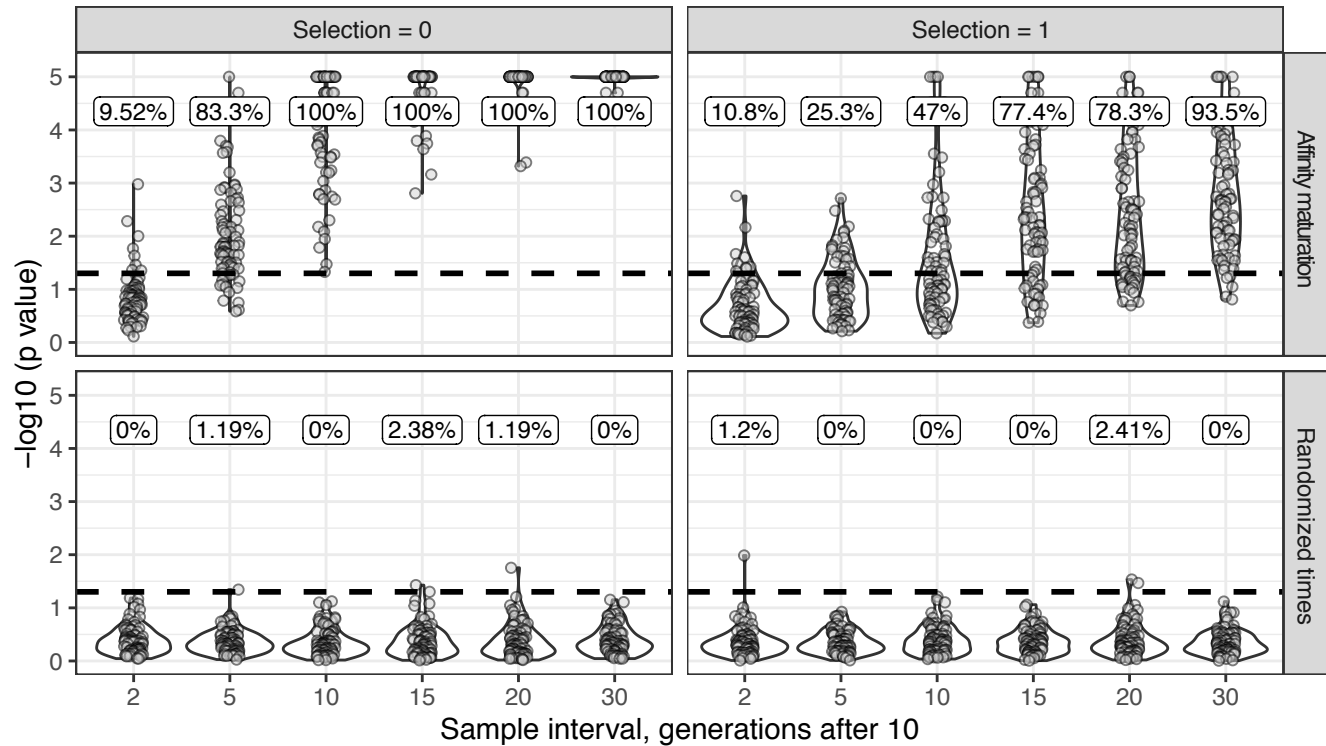

Supplement: supp [file elife_poa_e70873_Figure_1_figure_supplement_3.pdf › elife_poa_e70873_Figure_1_figure_supplement_3.pdf]

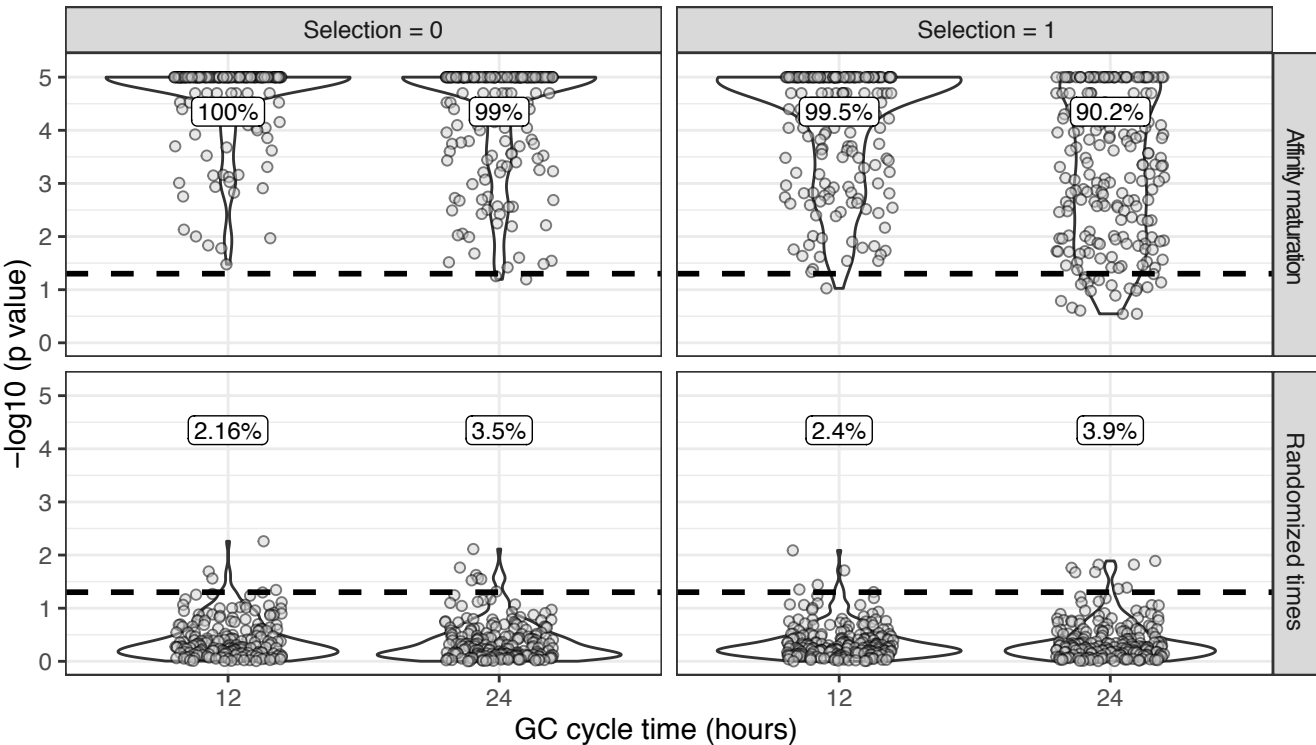

Supplement: supp [file elife_poa_e70873_Figure_1_figure_supplement_4.pdf › elife_poa_e70873_Figure_1_figure_supplement_4.pdf]

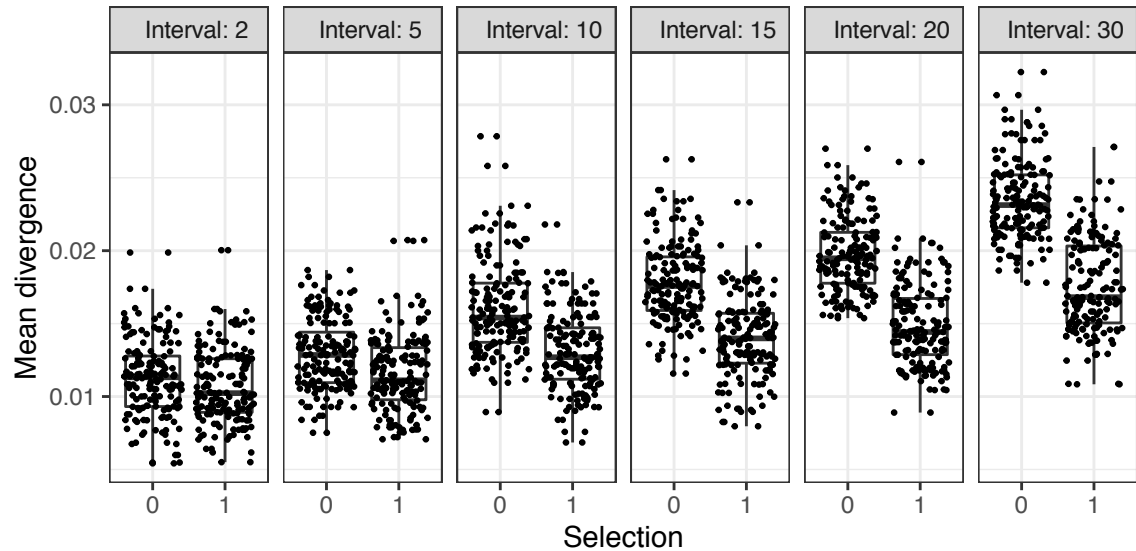

Supplement: supp [file elife_poa_e70873_Figure_1_figure_supplement_5.pdf › elife_poa_e70873_Figure_1_figure_supplement_5.pdf]

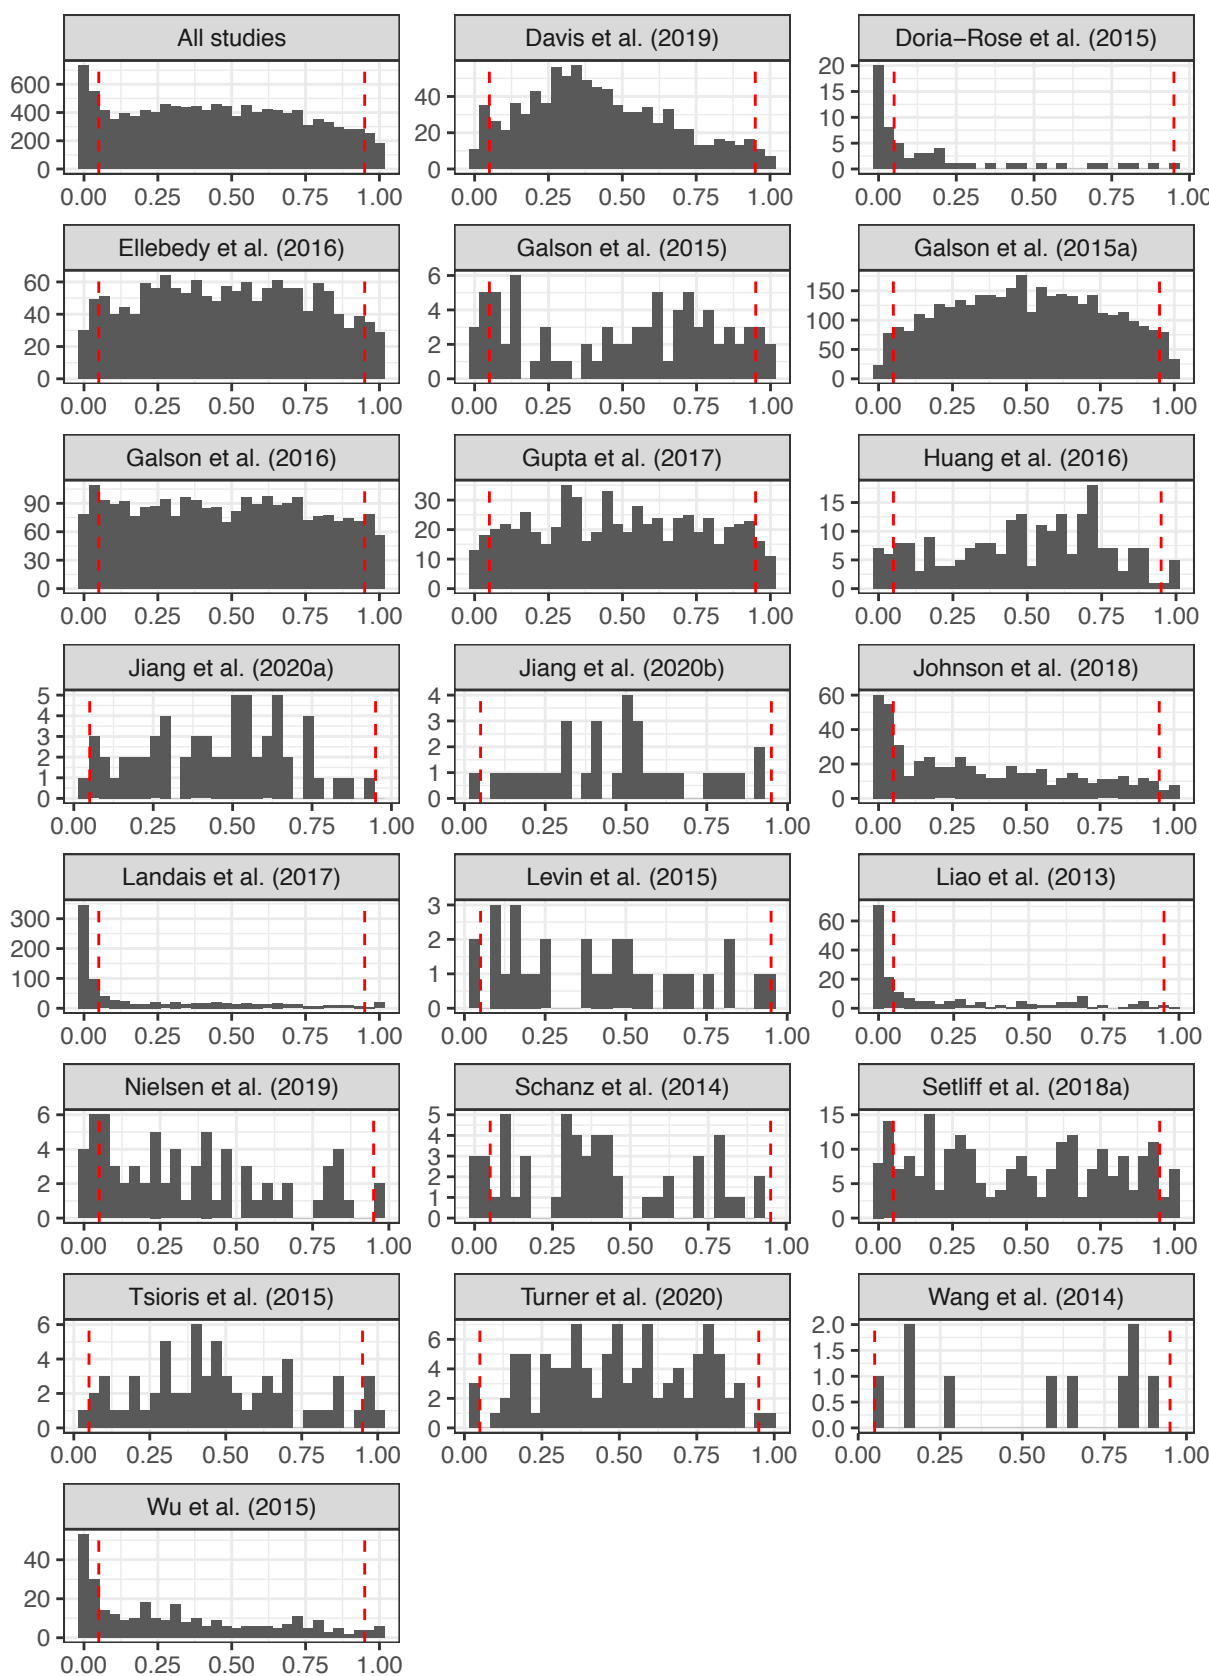

Supplement: supp [file elife_poa_e70873_Figure_2_figure_supplement_1.pdf › elife_poa_e70873_Figure_2_figure_supplement_1.pdf]

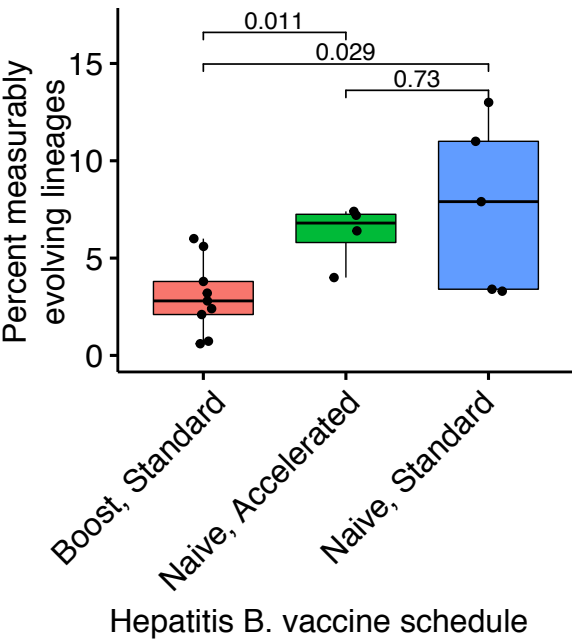

Supplement: supp [file elife_poa_e70873_Figure_2_figure_supplement_2.pdf › elife_poa_e70873_Figure_2_figure_supplement_2.pdf]

● Davis et al. (2019)      ● Landais et al. (2017)      ● Turner et al (2020)  
● Doria-Rose et al. (2015)      ● Liao et al. (2013)      ● Wu et al. (2015)

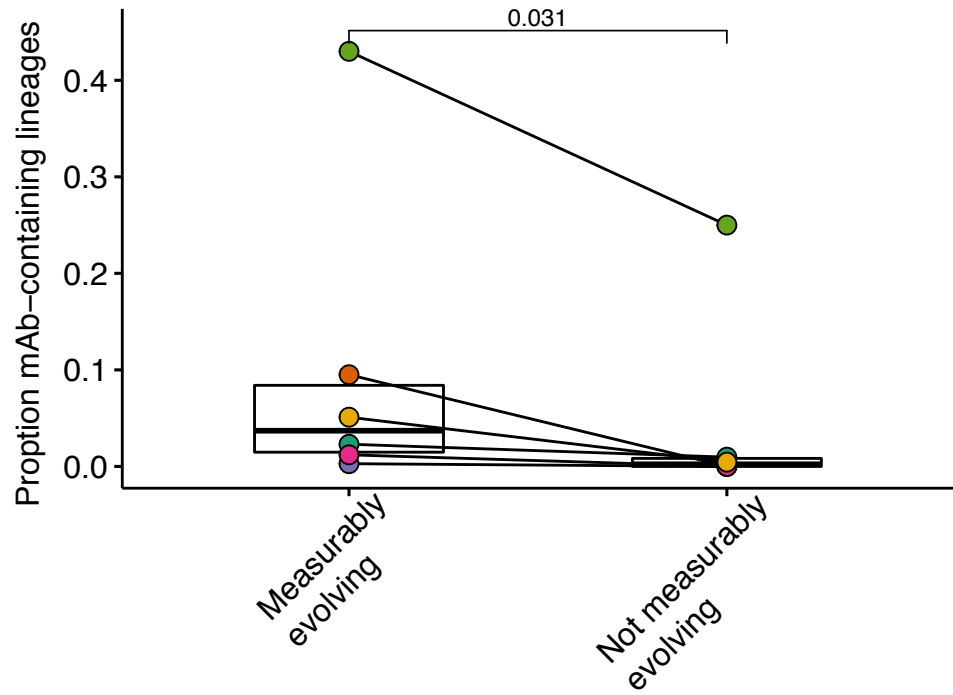

Supplement: supp [file elife_poa_e70873_Figure_2_figure_supplement_3.pdf › elife_poa_e70873_Figure_2_figure_supplement_3.pdf]

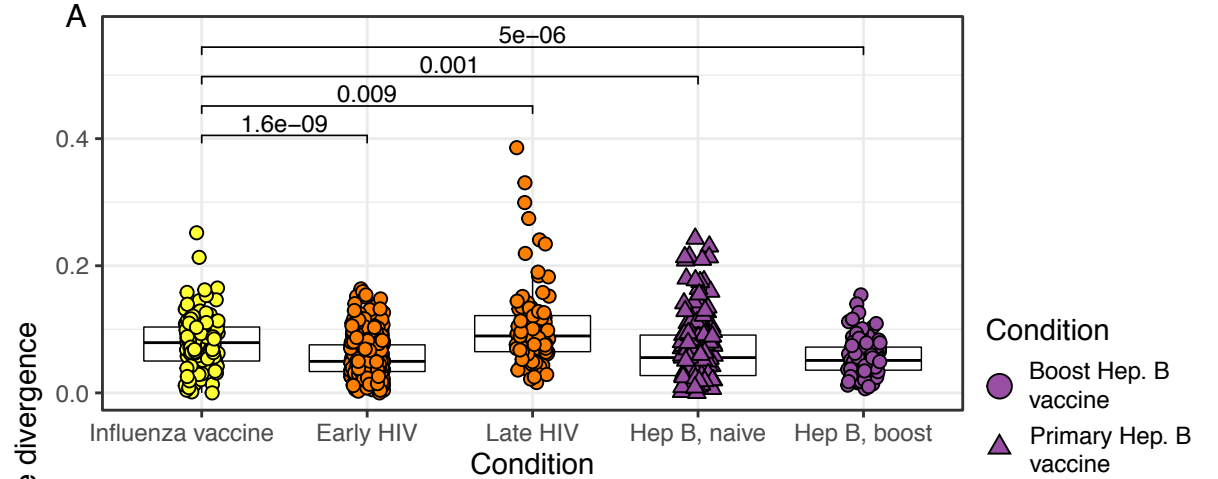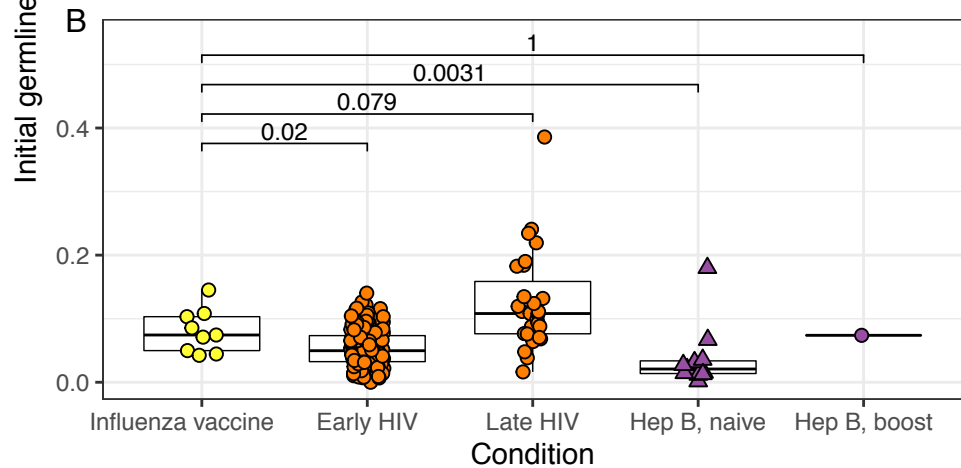

Supplement: supp [file elife_poa_e70873_Figure_2_figure_supplement_4.pdf › elife_poa_e70873_Figure_2_figure_supplement_4.pdf]

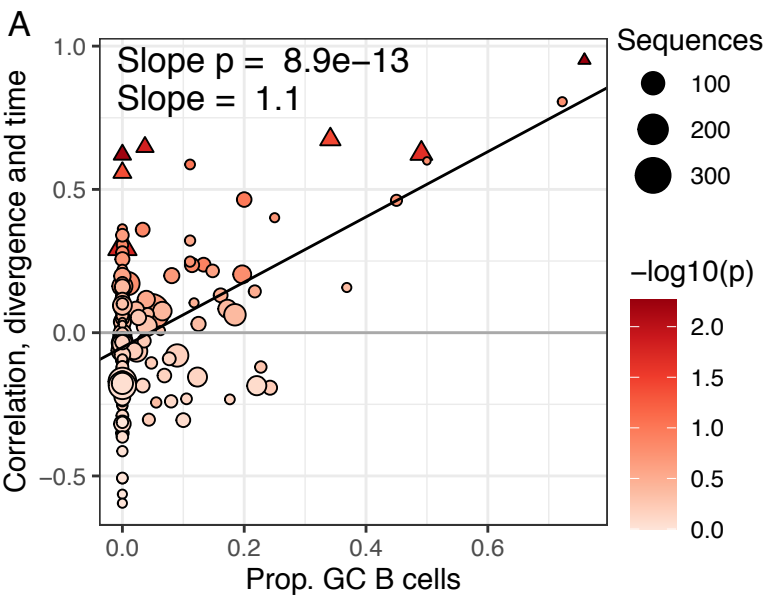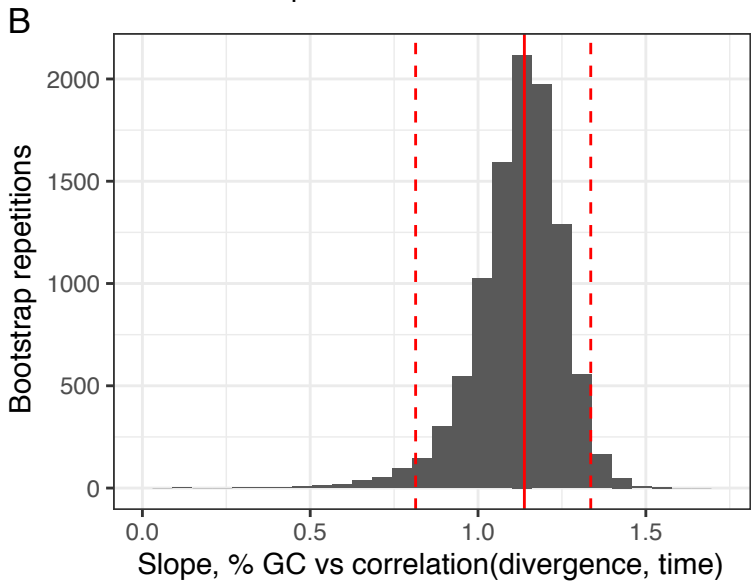

Supplement: supp [file elife_poa_e70873_Figure_3_figure_supplement_1.pdf › elife_poa_e70873_Figure_3_figure_supplement_1.pdf]

Sequences

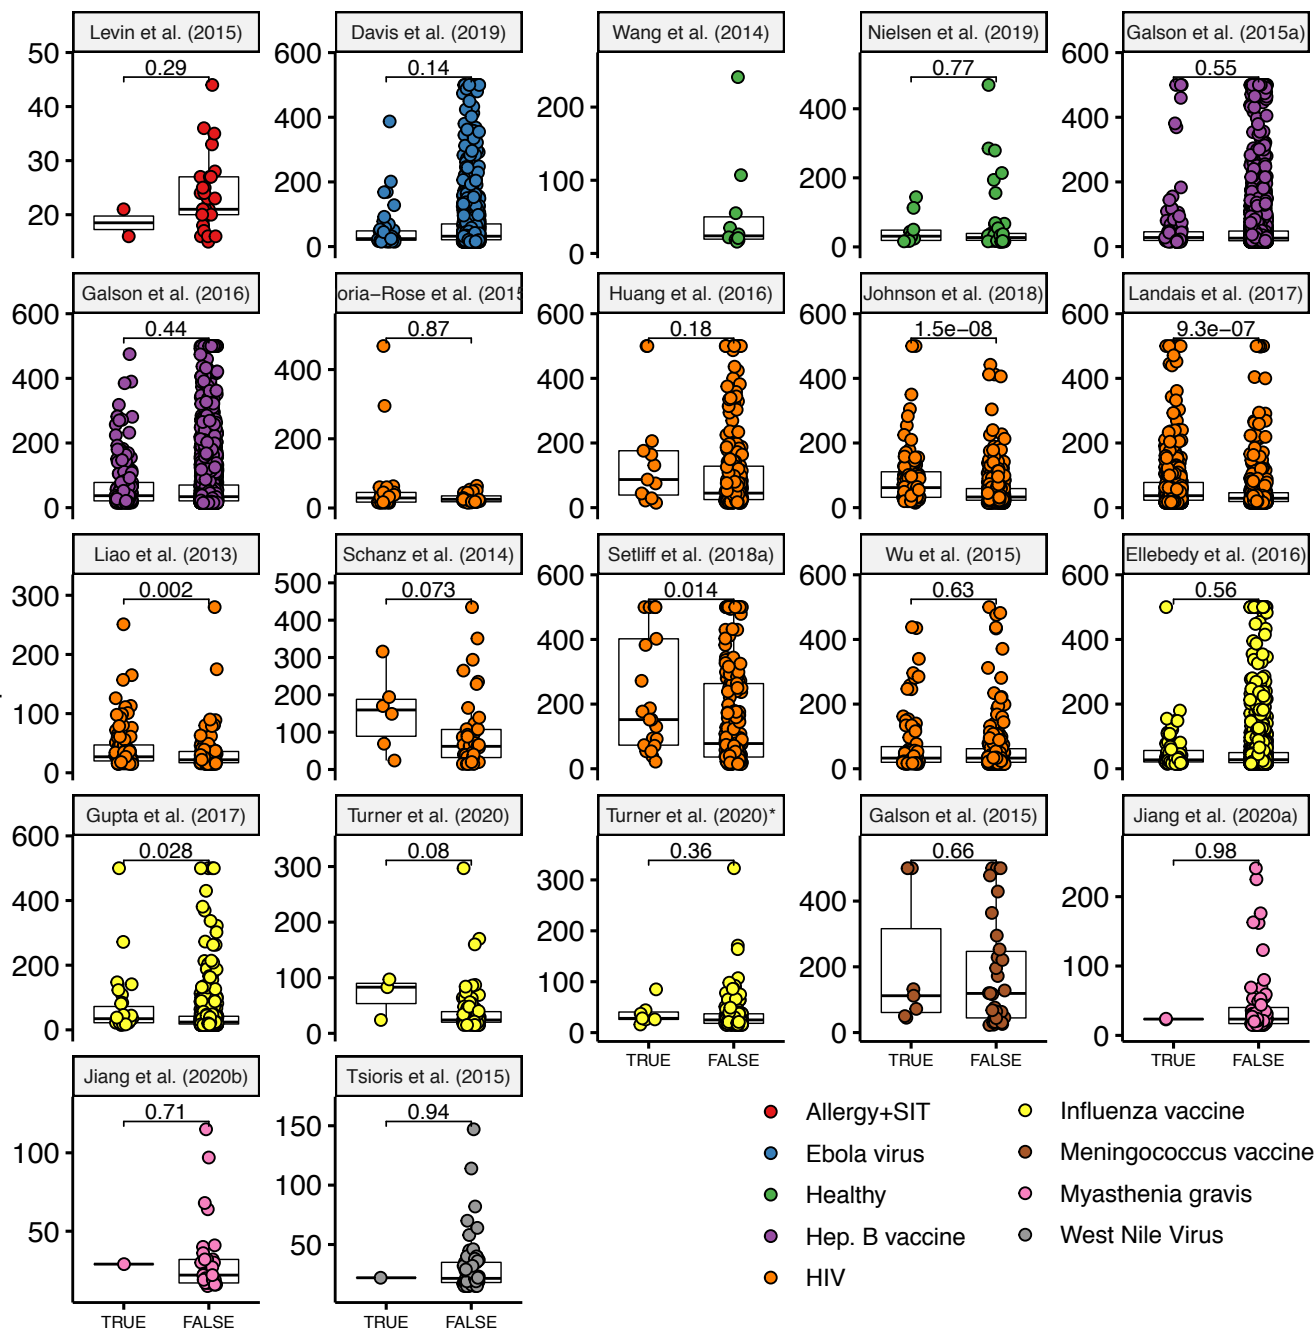

Measurably evolving?

Supplement: supp [file elife_poa_e70873_Figure_3_figure_supplement_2.pdf › elife_poa_e70873_Figure_3_figure_supplement_2.pdf]

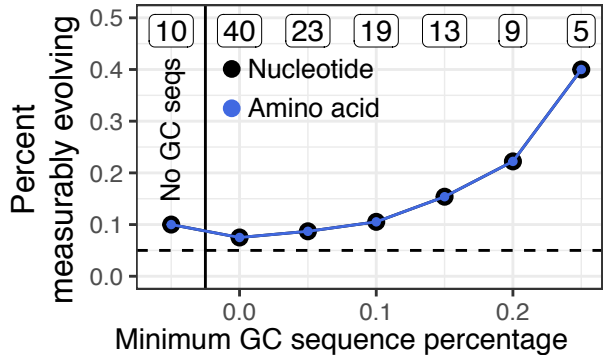

Supplement: supp [file elife_poa_e70873_Figure_3_figure_supplement_3.pdf › elife_poa_e70873_Figure_3_figure_supplement_3.pdf]
